# Supplementary material for: Theorizing Actor Interactions Shaping Innovation in Digital Infrastructures: The Case of Residential Internet Development in Belarus
Source: Atypon-hosted journal article supplement (doi:10.1287/orsc.2020.1389), 2020-10-26
Supplement: orsc.2020.1389.sm2.pdf [file orsc.2020.1389.sm2.pdf]

## Appendix B. Secondary Data Sources

**Table B1. Details on secondary data sources**

| Source <sup>1</sup>                                                    | N    | Details                                                                                                                                                                                                                                                                                                                                                                                                                                                                                                                                                                                                                                                                                                                                                                                                                                                                                                                                                                                                                                                                                                                                                                                                                                                                                                                                                                                                                                                                                                                                                                                                                                                                                                                                                 |
|------------------------------------------------------------------------|------|---------------------------------------------------------------------------------------------------------------------------------------------------------------------------------------------------------------------------------------------------------------------------------------------------------------------------------------------------------------------------------------------------------------------------------------------------------------------------------------------------------------------------------------------------------------------------------------------------------------------------------------------------------------------------------------------------------------------------------------------------------------------------------------------------------------------------------------------------------------------------------------------------------------------------------------------------------------------------------------------------------------------------------------------------------------------------------------------------------------------------------------------------------------------------------------------------------------------------------------------------------------------------------------------------------------------------------------------------------------------------------------------------------------------------------------------------------------------------------------------------------------------------------------------------------------------------------------------------------------------------------------------------------------------------------------------------------------------------------------------------------|
| HomeNet financial records                                              | 9    | Records in Excel on expenses, repairs and community money for 2008, 2009, and 2009, and 2010                                                                                                                                                                                                                                                                                                                                                                                                                                                                                                                                                                                                                                                                                                                                                                                                                                                                                                                                                                                                                                                                                                                                                                                                                                                                                                                                                                                                                                                                                                                                                                                                                                                            |
| HomeNet photos and videos                                              | 200+ | Capturing HomeNet creation, development, maintenance and repair works as well as various HomeNet social activities (e.g. “network tea”, “network football”), self-made video tutorials on the frequently asked questions                                                                                                                                                                                                                                                                                                                                                                                                                                                                                                                                                                                                                                                                                                                                                                                                                                                                                                                                                                                                                                                                                                                                                                                                                                                                                                                                                                                                                                                                                                                                |
| HomeNet maps                                                           | 13   | HomeNet maps illustrating wired and wireless connections between apartments and houses as well as maps providing details on the connected users)                                                                                                                                                                                                                                                                                                                                                                                                                                                                                                                                                                                                                                                                                                                                                                                                                                                                                                                                                                                                                                                                                                                                                                                                                                                                                                                                                                                                                                                                                                                                                                                                        |
| HomeNet statutes                                                       | 17   | Documents developed by HomeNets to specify and regulate their activities (e.g. procedures of acceptance and exclusions of new members, creation and distribution of community funds, member and admin responsibilities) and defining what they are (e.g. not-for-profit associations of residents)                                                                                                                                                                                                                                                                                                                                                                                                                                                                                                                                                                                                                                                                                                                                                                                                                                                                                                                                                                                                                                                                                                                                                                                                                                                                                                                                                                                                                                                      |
| HomeNet websites                                                       | 2    | News and posts about HomeNet practices, development and services (e.g. <a href="http://dom15.narod.ru">http://dom15.narod.ru</a> ) ; a complete archived version of the national website of HomeNets <sup>2</sup> , <a href="http://Homenets.tut.by">Homenets.tut.by</a> . As on 2009, the website comprised 22,054 registered HomeNet users and 820 HomeNets and comprised their and users information as well as forums on expertise and technical solutions, community life, juridical and legal information forums, a searchable dynamic HomeNet map , HomeNet rankings and discussion of ISPs, and their related news (e.g. <a href="http://homenet.dev.atmatic.com:8082/?action=map">http://homenet.dev.atmatic.com:8082/?action=map</a> , <a href="http://homenet.dev.atmatic.com:8082/02_02_2007.gif">http://homenet.dev.atmatic.com:8082/02_02_2007.gif</a> ).                                                                                                                                                                                                                                                                                                                                                                                                                                                                                                                                                                                                                                                                                                                                                                                                                                                                                 |
| ISP websites                                                           | 4    | Data on ISP strategy, news, technologies, services and offers related to HomeNets: <i>Beltelecom</i> (ByFly) ( <a href="http://www.beltelecom.by">http://www.beltelecom.by</a> , <a href="http://www.byfly.by">http://www.byfly.by</a> ); <i>Solo</i> ( <a href="http://www.solo.by">http://www.solo.by</a> ); <i>AtlantTelecom</i> ( <a href="http://www.telecom.by">http://www.telecom.by</a> ); <i>Bellfonet</i> ( <a href="http://www.adsl.by">http://www.adsl.by</a> ); <i>Aichyna</i> ( <a href="http://www.aplus.by">http://www.aplus.by</a> , <a href="http://www.aichyna.com">http://www.aichyna.com</a> , <a href="http://www.aichyna.by">http://www.aichyna.by</a> ); <i>Next</i> ( <a href="http://www.next.by">http://www.next.by</a> ); <i>IP TelCom</i> ( <a href="http://www.iptel.by">http://www.iptel.by</a> ); <i>Anitex</i> ( <a href="http://www.anitex.by">http://www.anitex.by</a> ), <i>Delovaya Set'</i> ( <a href="http://www.bn.by">http://www.bn.by</a> )                                                                                                                                                                                                                                                                                                                                                                                                                                                                                                                                                                                                                                                                                                                                                                   |
| Webpages of online discourses related to the context of HomeNets       | 68   | Data on the context of HomeNet emergence and development, including interviews with HomeNet experts, Internet-technology lawyers , ISP and HomeNet ISP directors and politicians (e.g. <a href="https://tech.onliner.by/2013/09/03/unet-by">https://tech.onliner.by/2013/09/03/unet-by</a> <a href="http://42.tut.by/190425">http://42.tut.by/190425</a> , <a href="https://tech.onliner.by/2013/10/24/flynet-by">https://tech.onliner.by/2013/10/24/flynet-by</a> , <a href="https://tech.onliner.by/2010/07/30/sukach_at">https://tech.onliner.by/2010/07/30/sukach_at</a> ; <a href="https://news.tut.by/it/162646.html">https://news.tut.by/it/162646.html</a> ), articles in newspapers and journals (e.g. <a href="https://42.tut.by/183507">https://42.tut.by/183507</a> ; <a href="http://www.nestor.minsk.by/kg/2002/50/kg25001.html">http://www.nestor.minsk.by/kg/2002/50/kg25001.html</a> ; <a href="https://www.sb.by/articles/dks-mezhdu-anarkhiey-i-diktaturuy.html">https://www.sb.by/articles/dks-mezhdu-anarkhiey-i-diktaturuy.html</a> ; ) daily news and discussions on major Internet and IT forums since 2000 (e.g. see <a href="http://tut.by/">http://tut.by/</a> , <a href="http://HomeNet.tut.by/">http://HomeNet.tut.by/</a> ; <a href="http://providers.by/">http://providers.by/</a> , <a href="http://www.interminsk.com/providers/archive">http://www.interminsk.com/providers/ archive</a> from 2005-2011); <a href="http://www.e-belarus.org/news/">http://www.e-belarus.org/news/</a> ( <a href="http://www.e-belarus.org/news/">archive</a> from 2001-2016) as well as publications recording the history of Internet development in Belarus (e.g. <a href="https://42.tut.by/397571">https://42.tut.by/397571</a> ) |
| Books and research articles                                            | 18   | Publications and contextual details on the development of Internet technologies in Belarus ifrom1991 - 2015 (e.g. Rybik 2012; Seklickiy 2000; Zabrodskaya 2013)                                                                                                                                                                                                                                                                                                                                                                                                                                                                                                                                                                                                                                                                                                                                                                                                                                                                                                                                                                                                                                                                                                                                                                                                                                                                                                                                                                                                                                                                                                                                                                                         |
| Government laws and Internet regulations; statistics of Internet users | 11   | Data on statistical indicators in IT development and Internet access by the National Statistical Committee and the Ministry of Internal Affairs (e.g. <a href="http://n1.by/news/2014/05/17/590046.html">http://n1.by/news/2014/05/17/590046.html</a> ) as well as documents on national regulation of Internet sphere in Belarus (e.g. Law on information protection and informatization 2008/2014/2016; Law on National regulation of Internet 2010 (Decree N. 60); Law on electronic networks and connections 2005)                                                                                                                                                                                                                                                                                                                                                                                                                                                                                                                                                                                                                                                                                                                                                                                                                                                                                                                                                                                                                                                                                                                                                                                                                                  |
| ITU reports                                                            | 4    | Statistical data from the International Telecommunication Union (ITU) on the number of IT and Internet users in Belarus comparative to other countries in the world (e.g. ITU 2001; ITU 2010; ITU 2014; ITU 2016 <sup>3</sup> )                                                                                                                                                                                                                                                                                                                                                                                                                                                                                                                                                                                                                                                                                                                                                                                                                                                                                                                                                                                                                                                                                                                                                                                                                                                                                                                                                                                                                                                                                                                         |

<sup>1</sup> in Russian/Belarusian

<sup>2</sup> The website functioned from 2002-2010 and was closed after HomeNets were announced illegal following the requests from administrators as their and user personal information could be used against them. After a request from the researchers, in November 2016 the website developer temporary restored a limited (without personal details) version of the website as it was in 2009.

<sup>3</sup> [https://www.itu.int/ITU-D/ict/publications/idi/material/2010/MIS\\_2010\\_without\\_annex\\_4-e.pdf](https://www.itu.int/ITU-D/ict/publications/idi/material/2010/MIS_2010_without_annex_4-e.pdf), [https://www.itu.int/en/ITU-D/Statistics/Documents/publications/mis2014/MIS2014\\_without\\_Annex\\_4.pdf](https://www.itu.int/en/ITU-D/Statistics/Documents/publications/mis2014/MIS2014_without_Annex_4.pdf), <https://www.itu.int/en/ITU-D/Statistics/Documents/publications/misr2016/MISR2016-w4.pdf>
